# Supplementary material
Source: PubMed Central journal article supplement (PMC5076565)
Supplement: NIHMS814253-supplement-4.pdf [file NIHMS814253-supplement-4.pdf]

## **Supplemental Experimental Procedures**

### **Sciatic nerve transection**

Under deep inhaled anesthesia with 2% isoflurane, the right sciatic nerve was exposed at the thigh, just below the sciatic notch. Both the proximal and distal sides were ligated with monocryl 4-0 sutures, and about 2 mm of sciatic nerve was cut between the ligations to prevent axonal regeneration. At 1, 3, 7 and 14 days after surgery, the muscle was harvested and frozen for RNA analysis.

### **CLAMS**

Oxygen consumption ( $VO_2$ ), carbon dioxide production ( $VCO_2$ ), spontaneous motor activity and food intake were measured using the Comprehensive Laboratory Monitoring System (CLAMS, Columbus Instruments), an integrated open-circuit calorimeter equipped with an optical beam activity monitor. For the analysis at resting condition, mice were weighed each time before the measurements and individually placed into sealed chambers (7.9" x 4" x 5") with free access to food and water. The study was carried out in an experimentation room set at 20-23°C with 12-12 hours (6:00PM~6:00AM) dark-light cycles. Measurements were carried out continuously for 72 hours. During this time, animals were provided with food and water through the equipped feeding and drinking devices located inside the chamber. The amount of food consumed by each animal was monitored through a precision balance.  $VO_2$  and  $VCO_2$  in each chamber were sampled sequentially for 5 seconds in 10 min intervals, and the motor activity was recorded every second in X and Z dimensions. The airflow rate

through the chamber was adjusted to keep the oxygen differential around 0.3% at resting conditions.

CLAMS analysis during acute running was performed as follows. Before the study, mice were individually placed into treadmill chambers to acclimate them for 15-20 min/day on 3 consecutive days. Mice were weighed prior to and right after running. They were then individually placed into the sealed treadmill chambers (305 x 51 x 44 mm<sup>3</sup>). The slope of the treadmill was set at 25° to the horizontal. The study was carried out in an experimentation room set at 20-23°C with 12-12 hours (6:00PM~6:00AM) dark-light cycles. The measurements were made between 9:00 AM – 1:00 PM. During this time, the animals were run on the treadmill one at a time and the treadmill was wiped clean between each test. The system was routinely calibrated before the experiment using a standard gas (20.5% O<sub>2</sub> and 0.5% CO<sub>2</sub> in N<sub>2</sub>). VO<sub>2</sub> and VCO<sub>2</sub> in each chamber were sampled continuously every 5 seconds. The air flow rate through the chambers was set at 0.50 LPM. During the analysis mice ran under a treadmill schedule consisting of increasing speeds by increments of 3 m/min every 5 minutes for a total of 30 minutes, starting at 5 m/min. Exhaustion was determined by the mouse sitting on the shocker (1.60mA, 120v, 3Hz) for 5 consecutive seconds, at which point shocker was shut off and the treadmill stopped.

### **Glucose tolerance test**

Age matched AR113Q and wild type males (n=7-8/genotype) were fasted for 5 hours starting at 8:30am. Glucose (50%) was administered at ~1:30 pm via intraperitoneal injection at 1.5g/kg. Blood samples were collected prior to and after the injection at time 0, 15, 30, 60, and 120 minutes via tail vein bleeding. Blood levels of glucose were measured using a

glucometer (Acucheck, Roche) and plasma levels of insulin were determined using Millipore rat/mouse insulin ELISA kit. Animals were restrained repeatedly for less than one minute each time blood samples were collected.

## **Metabolomics**

The mass spectrometer was operated in ESI-mode according to previously published conditions (Lorenz et al., 2011). Data were processed using MassHunter Quantitative analysis version B.07.00. Metabolites in the glycolysis/TCA cycle/pentose phosphate pathways were normalized to the nearest isotope labeled internal standard and quantitated using 2 replicated injections of 5 standards to create a linear calibration curve with accuracy better than 80% for each standard. Other compounds in the analysis were normalized to the nearest internal standard, and the peak areas were used for differential analysis between groups.

## **Mitochondria uncoupling**

Mitochondria were isolated from quadriceps muscles of WT and AR113Q mice, and uncoupling was assessed as detailed in the Supplemental Experimental Procedures. Briefly, tissues were finely chopped in PBS containing 10 mM EDTA, incubated in 0.25% trypsin in PBS/EDTA for 10 min at 4°C, then homogenized with a pre-cooled dounce homogenizer 10 times with the loose (A) pestle in 5x volume:weight IBM buffer (6.7 mL of 1M sucrose, 5.0 mL of 1 M Tris/HCl, 5 mL of 1 M KCl, 2.0 mL of 0.5 M EDTA, 2 mL of 10% BSA in 100ml final volume, pH 7.4). Unbroken cells and nuclei were pelleted at 900xg at 4°C for 5 min.

Supernatant was collected and centrifuged at 6200xg at 4°C for 10 min. Pelleted mitochondria were re-suspended in 1 ml IBM buffer, centrifuged again at 6200xg at 4°C for 5 min, and finally re-suspended in 150 µl IBM buffer. Protein concentration was measured by BCA assay (Bicinchoninic acid assay, Life Technologies) and mitochondria uncoupling was assessed by Seahorse analysis. Uncoupling was considered as a ratio between basal readings of O<sub>2</sub> consumption in presence of succinate and readings of O<sub>2</sub> consumption after treatment with complex III inhibitor antimycin A, and was calculated as  $(1 - \text{AntiA} / \text{Average}(\text{Basal1}; \text{Basal2}))$ .

### **Supplemental Reference**

Lorenz, M.A., Burant, C.F., and Kennedy, R.T. (2011). Reducing time and increasing sensitivity in sample preparation for adherent mammalian cell metabolomics. *Anal Chem* 83, 3406-3414.

## Supplemental Figures and Legends

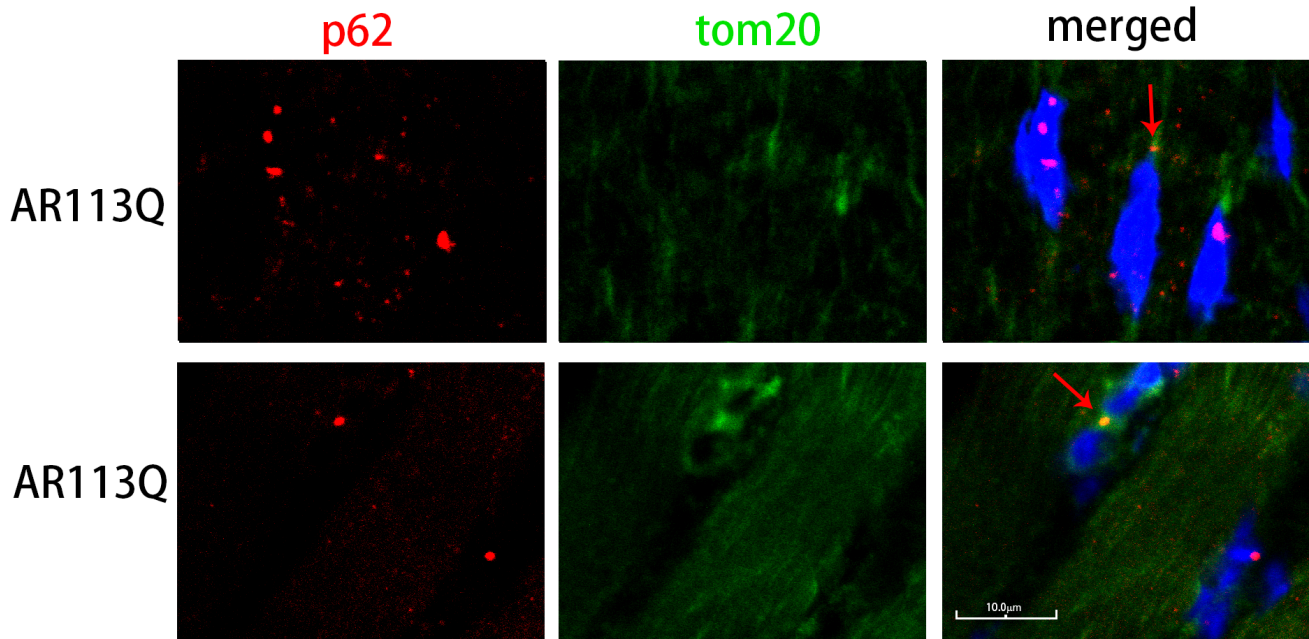

**Supplemental Figure 1. Co-localization of p62 and TOM20 in AR113Q skeletal muscle.**

**Related to Figure 3.** Punctate p62 staining (red) is observed in nuclei and cytosol of AR113Q muscle. Cytosolic p62 puncta co-localize with the mitochondrial marker TOM20 (green).

Scale bar: 10 µm.

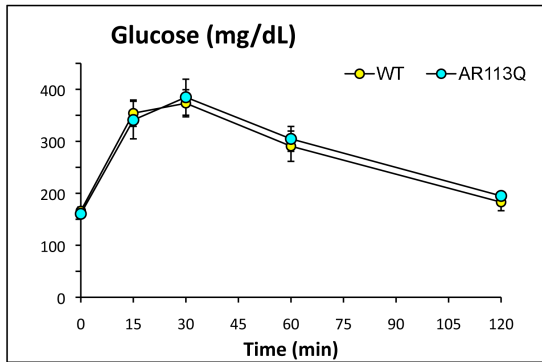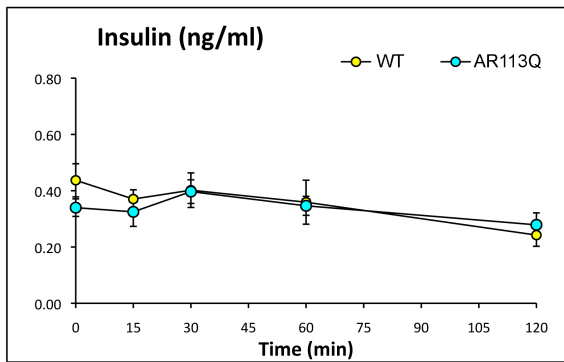

**Supplemental Figure 2. Blood glucose and serum insulin levels as measured during a glucose tolerance test. Related to Figure 4.** 14 week old wild type (yellow, n=8) or AR113Q males (blue, n=7) were fasted for 5 hours. Glucose (50%) was administered at 1.5g/kg. Blood samples were collected prior to and after the injection at time 0, 15, 30, 60, and 120 minutes. Blood levels of glucose and plasma levels of insulin are reported as mean  $\pm$  SEM.

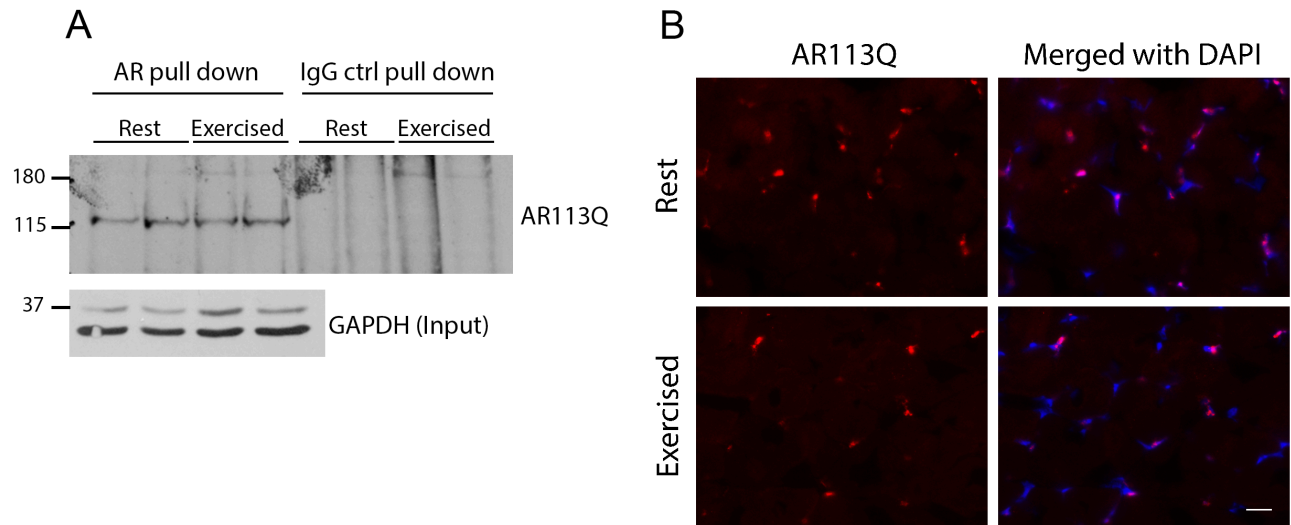

**Supplemental Figure 3. AR113Q protein expression is unchanged by chronic exercise.**

**Related to Figure 5.** AR113Q mice were run on a treadmill 5 days/week for 30 min at 10 meters/minute for 6 weeks, from 8 – 14 weeks of age. Control mice (“rest”) were placed on the treadmill for an equivalent time, but the apparatus was not turned on. **(A)** AR protein levels in quadriceps of rest and exercised AR113Q mice were analyzed by immunoprecipitation and western blot. **(B)** Immunofluorescence staining for AR (red) in quadriceps. Nuclei were stained by DAPI (blue). Scale bar: 20  $\mu$ m.

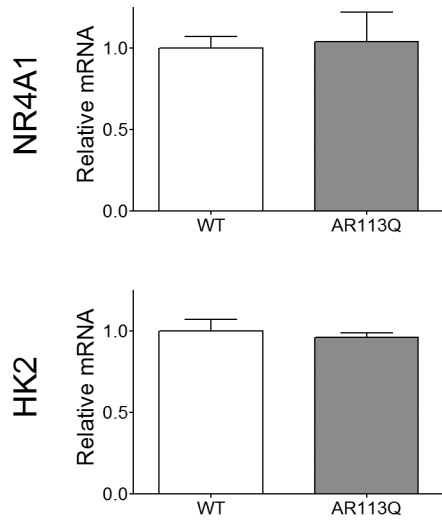

**Supplemental Figure 4. NR4A1 and HK2 gene expression is not altered in spinal cord of AR113Q mice. Related to Figure 7.** Relative mRNA levels of NR4A1 (**top**) and HK2 (**bottom**) in spinal cord of WT and AR113Q mice at 14 weeks of age (mean  $\pm$  SEM; n = 4/group). Values are not statistically different by Student's *t*-test.



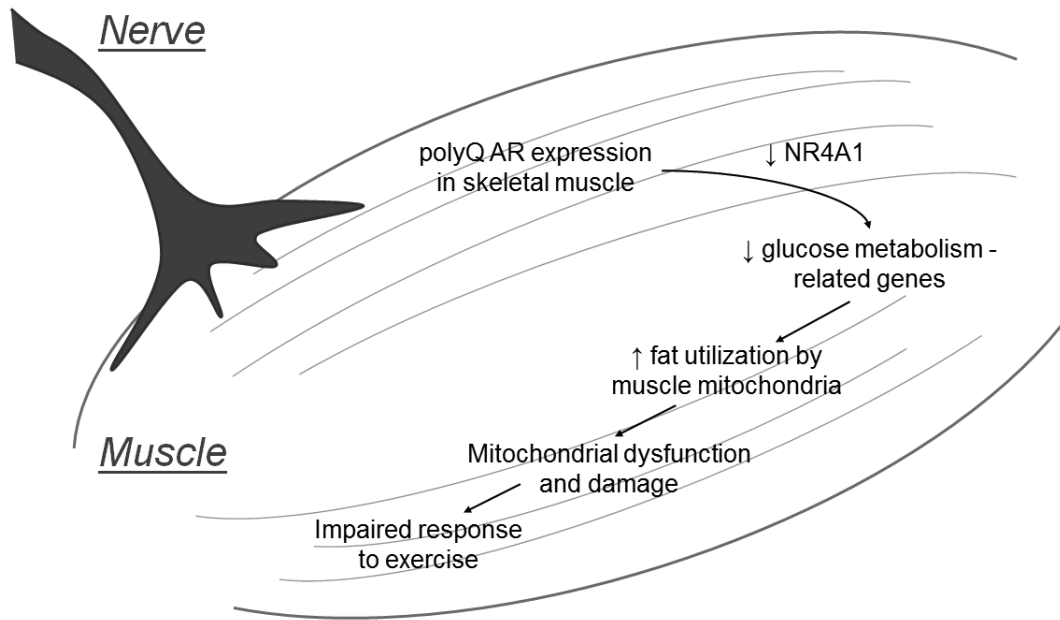

**Supplemental Figure 5. Model of metabolic consequences of polyQ AR expression in skeletal muscle. Related to Discussion.** In AR113Q male mice, peripheral polyQ AR expression is sufficient to impair neuromuscular function (Lieberman et al., 2014). Here we show that this is associated with altered energy homeostasis in skeletal muscle, including diminished expression of genes controlling glucose metabolism and critical upstream regulators such as NR4A1. We propose that this results in a shift towards the utilization of alternative energy sources, such as fat, which damages mitochondria and stimulates their turnover, possibly through mitophagy. This altered energy metabolism lowers respiratory capacity of muscle and contributes to an impaired response to exercise. Changes in the expression of genes that control metabolism in skeletal muscle are rescued by peripheral polyQ AR gene suppression by administration of ASO.

**Supplemental Tables uploaded as separate files:**

**Supplemental Table 1**

Differentially expressed genes in quadriceps muscle of AR113Q *versus* WT mice that were rescued by ASO. Related to Figures 1 and 6.

**Supplemental Table 2**

Differentially expressed genes in quadriceps muscle of AR113Q *versus* WT mice that were not rescued by ASO. Related to Figures 1 and 6.

### Supplemental Table 3

Differentially expressed genes in AR113Q *versus* WT quadriceps muscles associated with Protein Kinase A signaling. Related to Figure 7.

| <b>gene symbol</b> | <b>NCBI ID</b> | <b>Description</b>                                         | <b>log<sub>2</sub>(FC)</b> | <b>p-value</b> | <b>q-value</b> |
|--------------------|----------------|------------------------------------------------------------|----------------------------|----------------|----------------|
| Adcy2              | 210044         | adenylate cyclase 2                                        | 0.61                       | 0.00005        | 0.00095        |
| Calm1              | 12313          | calmodulin 1                                               | -0.65                      | 0.00005        | 0.00095        |
| Camk2a             | 12322          | calcium/calmodulin-dependent protein kinase II alpha       | -0.95                      | 0.00005        | 0.00095        |
| Cnga3              | 12790          | cyclic nucleotide gated channel alpha 3                    | 1.22                       | 0.00020        | 0.00317        |
| Crem               | 12916          | cAMP responsive element modulator                          | 0.74                       | 0.00010        | 0.00175        |
| Dusp10             | 63953          | dual specificity phosphatase 10                            | -1.06                      | 0.00005        | 0.00095        |
| Finc               | 68794          | filamin C, gamma                                           | 0.65                       | 0.00010        | 0.00175        |
| Gng10              | 14700          | guanine nucleotide binding protein (G protein), gamma 10   | 0.60                       | 0.00200        | 0.02128        |
| Itp1               | 16438          | inositol 1,4,5-trisphosphate receptor 1                    | -1.16                      | 0.00005        | 0.00095        |
| Myl2               | 17906          | myosin, light polypeptide 2, regulatory, cardiac, slow     | -1.34                      | 0.00005        | 0.00095        |
| Myl3               | 17897          | myosin, light polypeptide 3                                | -1.57                      | 0.00005        | 0.00095        |
| Myl9               | 98932          | myosin, light polypeptide 9, regulatory                    | -0.65                      | 0.00005        | 0.00095        |
| Mylk2              | 228785         | myosin, light polypeptide kinase 2, skeletal muscle        | -1.38                      | 0.00005        | 0.00095        |
| Mylpf              | 17907          | myosin light chain, phosphorylatable, fast skeletal muscle | -1.32                      | 0.00005        | 0.00095        |
| Pde7a              | 18583          | phosphodiesterase 7A                                       | -0.84                      | 0.00005        | 0.00095        |
| Phkg1              | 18682          | phosphorylase kinase gamma 1                               | -0.65                      | 0.00005        | 0.00095        |
| Plcd1              | 18799          | phospholipase C, delta 1                                   | 0.61                       | 0.00020        | 0.00317        |
| Plcl1              | 227120         | phospholipase C-like 1                                     | 0.59                       | 0.00140        | 0.01598        |
| Ppp1r3a            | 140491         | protein phosphatase 1, regulatory (inhibitor) subunit 3A   | -0.64                      | 0.00005        | 0.00095        |
| Ppp1r3d            | 228966         | protein phosphatase 1, regulatory subunit 3D               | 0.74                       | 0.00310        | 0.03003        |
| Prkar2a            | 19087          | protein kinase, cAMP dependent regulatory, type II alpha   | -0.61                      | 0.00005        | 0.00095        |
| Ptprd              | 19266          | protein tyrosine phosphatase,                              | 1.10                       | 0.00005        | 0.00095        |

|       |       | receptor type, D                         |       |         |         |
|-------|-------|------------------------------------------|-------|---------|---------|
| Pygm  | 19309 | muscle glycogen phosphorylase            | -0.96 | 0.00105 | 0.01267 |
| Smad3 | 17127 | SMAD family member 3                     | -0.59 | 0.00005 | 0.00095 |
| Tgfb3 | 21809 | transforming growth factor, beta<br>3    | 0.69  | 0.00005 | 0.00095 |
| Tnni1 | 21952 | troponin I, skeletal, slow 1             | -1.59 | 0.00005 | 0.00095 |
| Ttn   | 22138 | titin                                    | -1.07 | 0.00020 | 0.00317 |
| Vasp  | 22323 | vasodilator-stimulated<br>phosphoprotein | -1.01 | 0.00005 | 0.00095 |

**Supplemental Table 4**

| <b>gene symbol</b> | <b>Description</b>                                                  | <b>AR113Q vs WT<br/>log<sub>2</sub>(FC)</b> |
|--------------------|---------------------------------------------------------------------|---------------------------------------------|
| Atf3               | activating transcription factor 3                                   | 2.94                                        |
| Pdk4               | pyruvate dehydrogenase kinase, isoenzyme 4                          | 0.79                                        |
| Ucp3               | uncoupling protein 3 (mitochondrial, proton carrier)                | 0.64                                        |
| Pgk1               | phosphoglycerate kinase 1                                           | -0.61                                       |
| Phkg1              | phosphorylase kinase gamma 1                                        | -0.65                                       |
| Ppp1r3c            | protein phosphatase 1, regulatory (inhibitor) subunit 3C            | -0.70                                       |
| Bpgm               | 2,3-bisphosphoglycerate mutase                                      | -0.71                                       |
| Lpin1              | lipin 1                                                             | -0.75                                       |
| Slc2a4             | solute carrier family 2 (facilitated glucose transporter), member 4 | -0.80                                       |
| Pfkm               | phosphofructokinase, muscle                                         | -0.93                                       |
| Pygm               | muscle glycogen phosphorylase                                       | -0.96                                       |
| Gpd1               | glycerol-3-phosphate dehydrogenase 1 (soluble)                      | -1.05                                       |
| Eno3               | enolase 3, beta muscle                                              | -1.13                                       |
| Aldoa              | aldolase A, fructose-bisphosphate                                   | -1.15                                       |
| Pgam2              | phosphoglycerate mutase 2                                           | -1.20                                       |
| Phka1              | phosphorylase kinase alpha 1                                        | -1.24                                       |
| Prkag3             | protein kinase, AMP-activated, gamma 3 non-catalytic subunit        | -1.27                                       |

Genes altered in quadriceps muscle of AR113Q mice responsive to NR4A1 expression. Related to Figure 7.
